# Supplementary material for: Constructing the nanointerpenetrating structure of PCDTBT:PC70BM bulk heterojunction solar cells induced by aggregation of PC70BM via mixed-solvent vapor annealing
Source: Royal Society of Chemistry journal article supplement (doi:10.1039/c3ta10629b), 2013-01-01
Supplement: c3ta10629b.pdf [file c3ta10629b.pdf]

*Supporting Information*

**Constructing Nanointerpenetrating Structure of PCDTBT:PC<sub>70</sub>BM  
Bulk Heterojunction Solar Cells Induced by Aggregation of PC<sub>70</sub>BM  
via Mixed-solvent Vapor Annealing**

Jiangang Liu, Liang Chen, Bingrong Gao, Xinxiu Cao, Yanchun Han\*, Zhiyuan Xie  
and Lixiang Wang

State Key Laboratory of Polymer Physics and Chemistry, Changchun Institute of  
Applied Chemistry, Chinese Academy of Sciences, 5625 Renmin Street, Changchun  
130022, P. R. China

\* To whom correspondence should be addressed, E-mail: [ychan@ciac.jl.cn](mailto:ychan@ciac.jl.cn)

Paper submitted to *Journal of Materials Chemistry A*

March 26, 2013

The estimated HOMO and LUMO energy levels from cyclic voltammetry for the PCDTBT used in this study is shown in Table S1, and its  $^1\text{H}$  NMR information of is:  $^1\text{H}$  NMR (400 MHz, ODCB- $d_4$ ):  $\delta$  8.11 (d,  $J = 3.5$  Hz, 2H); 8.02 (d,  $J = 8.1$  Hz, 2H); 7.94 (br, 2H); 7.74 (br, 2H); 7.56 (d,  $J = 7.8$  Hz, 2H); 7.45 (d,  $J = 3.6$  Hz, 2H); 4.73 (br, 1H); 2.42 (br, 2H); 2.05 (m, 2H); 1.23 (br, 8H); 1.22 (br, 16H); 0.70 (t,  $J = 6.8$  Hz, 6H).

| polymers | $E_{\text{ox}}^{\text{onset}}$ (V) | $E_{\text{red}}^{\text{onset}}$ (V) | HOMO (eV) | LUMO (eV) | Chemical band gap (eV) |
|----------|------------------------------------|-------------------------------------|-----------|-----------|------------------------|
| PCDTBT   | 0.60                               | -1.50                               | -5.40     | -3.30     | 2.10                   |

**Table S1.** The HOMO and LUMO energy levels from cyclic voltammetry for PCDTBT.

The ratio of THF to  $\text{CS}_2$  in mixed solvent has significant impact on the morphology of blend film as well. We used a series of mixed solvent with different ratios of THF to  $\text{CS}_2$ , including 7:3, 1:1 and 7:3, to treat the active layers of devices and tested its performances. The results showed that the device treated by the mixed solvent, THF: $\text{CS}_2$ =1:1, has the best device performance, as shown in Figure S1.

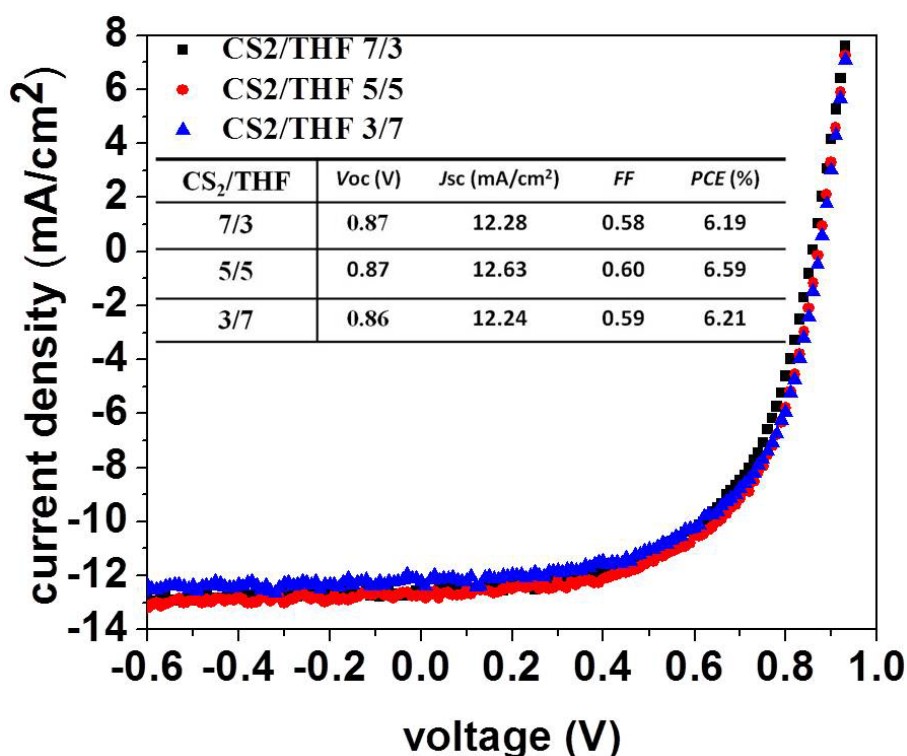

**Figure S1**  $I$ - $V$  curves for devices processed from PCDTBT:PC<sub>70</sub>BM ( $\phi_{\text{PC70BM}}=71.4$ )

wt%) films with different annealing treatment under AM 1.5 illumination. The mixed solvents have different ratios of THF to CS<sub>2</sub>, including 7:3, 1:1 and 7:3. The vapor pressure is P=0.81 (25 °C) and the annealing time is 5 min.

The annealing time are also an important parameter, the device were treated with different annealing time, including 3 min, 5min and 7 min, at the same vapor pressure. As shown in Figure S2, the device treated for 5 min showed the best performance.

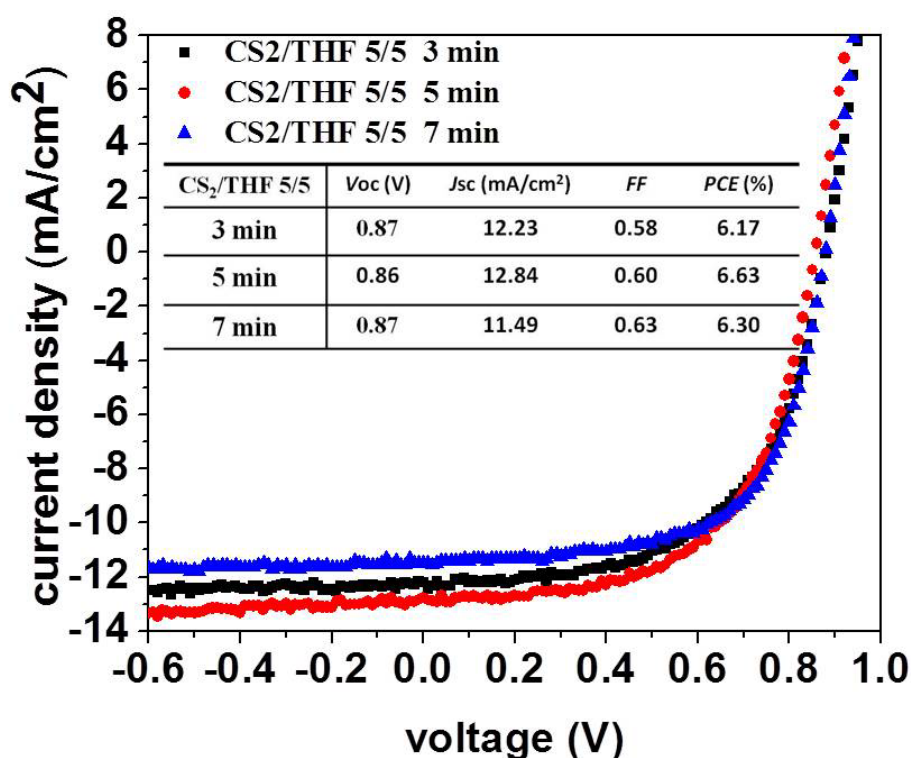

**Figure S2** *I-V* curves for devices processed from PCDTBT:PC<sub>70</sub>BM ( $\phi_{PC70BM}=71.4$  wt%) films with different annealing time, including 3 min, 5 min, 7 min, under AM 1.5 illumination. The mixed solvents have ratios of THF to CS<sub>2</sub> is 1:1. The vapor pressure is P=0.81 (25 °C) and the annealing time is 5 min.

The annealing pressure are also an important parameter, the device were treated with different vapor pressure, including P=0.75, 0.81 and 0.87 (25 °C). As shown in Figure S3, the device treated for P= 0.81(25 °C) showed the best performance.

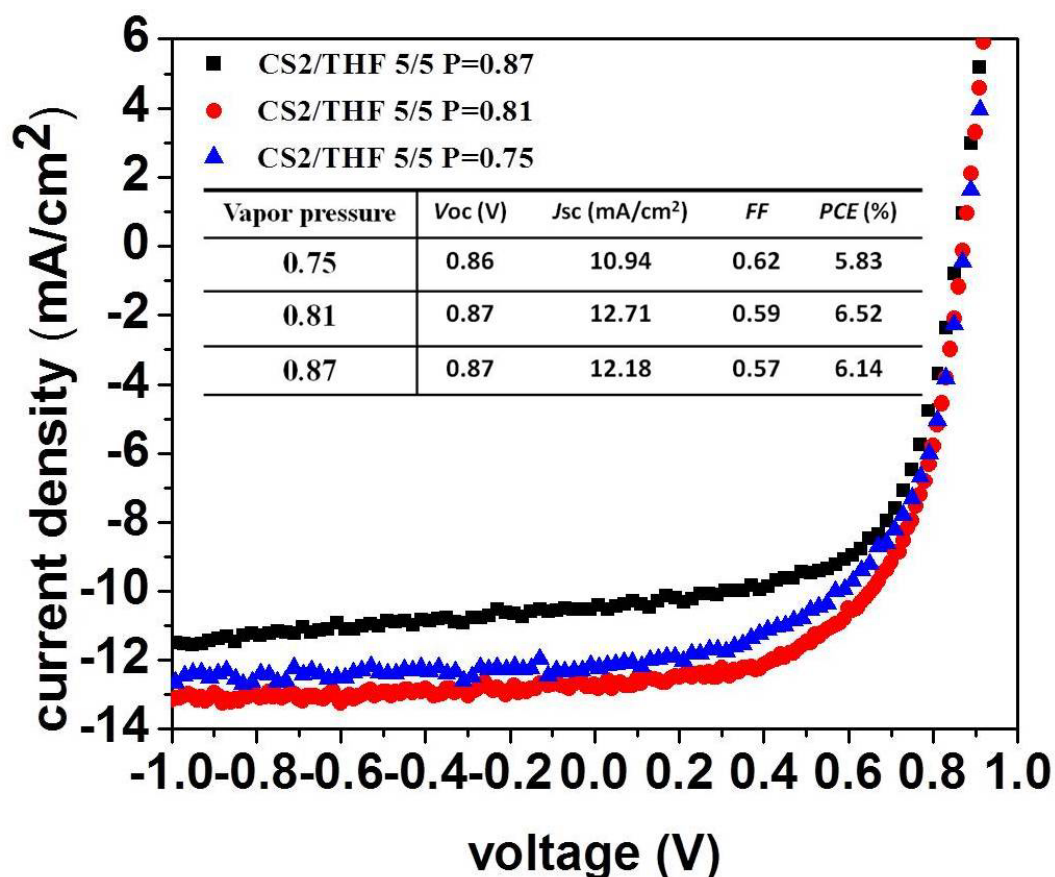

**Figure S3** *I-V* curves for devices processed from PCDTBT:PC<sub>70</sub>BM ( $\phi_{\text{PC}_{70}\text{BM}}=71.4$  wt%) films with different vapor pressures during the annealing process, including  $P=0.75$ ,  $0.81$  and  $0.87$  ( $25^\circ\text{C}$ ), under AM 1.5 illumination. The mixed solvents have ratios of THF to CS<sub>2</sub> is 1:1, the annealing time is 5 min.

The ratio of donor to acceptor has profound influence on the morphology of active layer as well as the device performance. Here, three ratios of PCDTBT to PC<sub>70</sub>BM, 1:1 ( $\phi_{\text{PC}_{70}\text{BM}}=50$  wt%), 2:5 ( $\phi_{\text{PC}_{70}\text{BM}}=71.4$  wt%) and 1:4 ( $\phi_{\text{PC}_{70}\text{BM}}=80$  wt%), were annealed under the mixed solvent vapor (the ratio of THF to CS<sub>2</sub> is 1:1 and the annealing time is 5 min). The PCDTBT could self-organize into nanofibrils regardless of the fullerene content after the MSV-A treatment. However, the extent of phase separation is more homogeneous when the content of PC<sub>70</sub>BM is 71.4 wt% and 80 wt%, as shown in Figure S4. After the device performance test, it is clear that the device with 71.4 wt% PCBM content has the best performance, as shown in Figure S5, which may result from the enhanced photon absorption as shown in Figure S6.

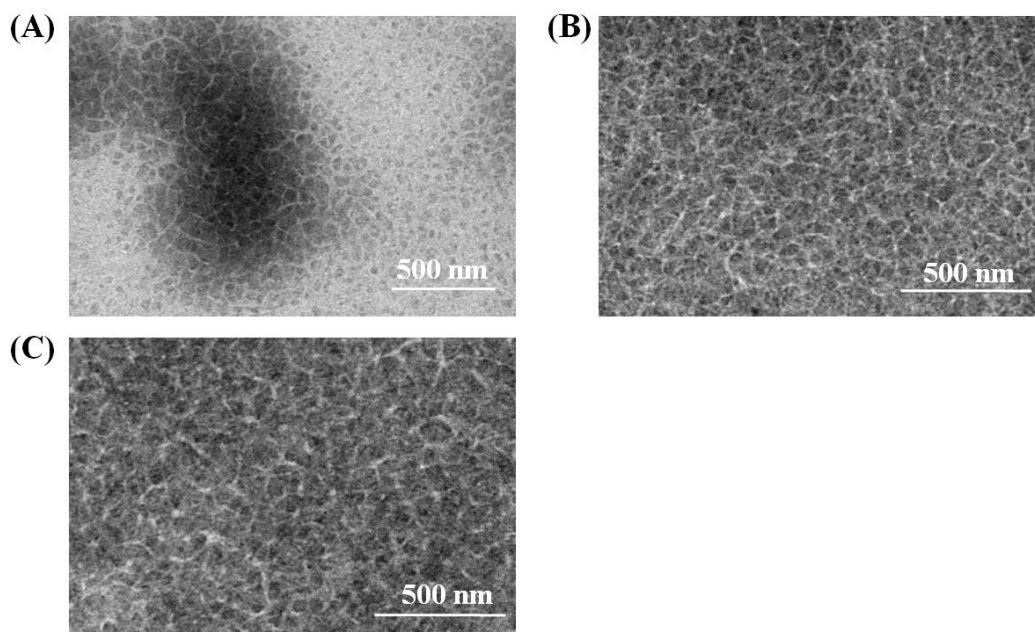

**Figure S4** TEM images of PCDTBT:PC<sub>70</sub>BM blend films with different fullerene content after the M-SVA treatment, (A)  $\phi_{\text{PC70BM}}=50$  wt%, (B)  $\phi_{\text{PC70BM}}=71.4$  wt% and (C)  $\phi_{\text{PC70BM}}=80$  wt%. The mixed solvents have ratios of THF to CS<sub>2</sub> is 1:1. The vapor pressure is  $P=0.81$  (25 °C) and the annealing time is 5 min.

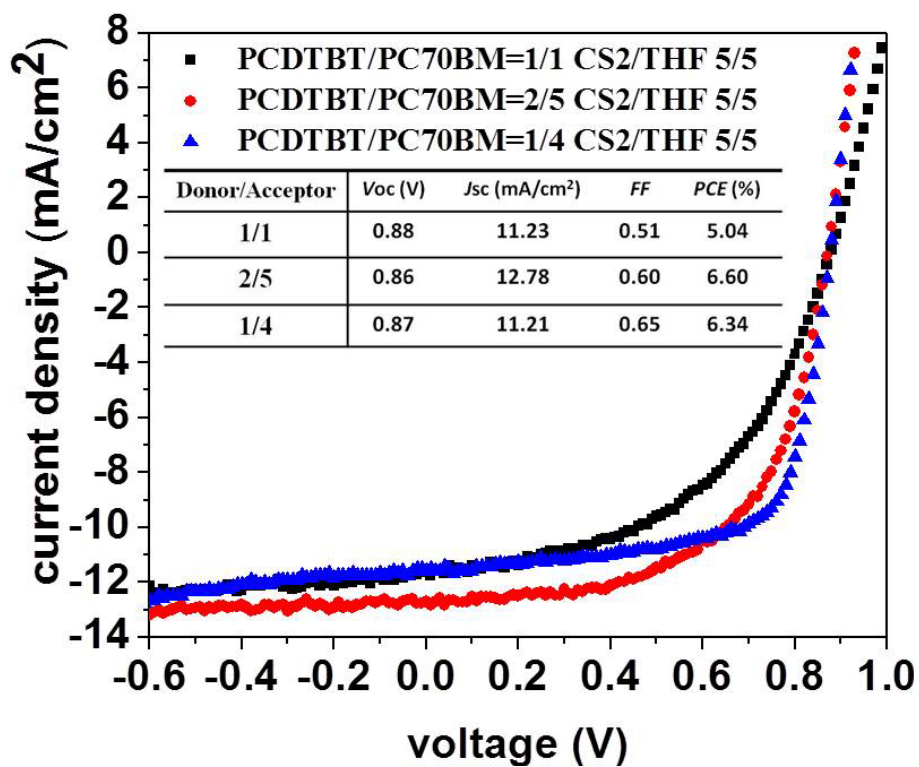

**Figure S5**  $I$ - $V$  curves for devices processed from PCDTBT:PC<sub>70</sub>BM films with

different fullerene content after the M-SVA treatment under AM 1.5 illumination. The mixed solvents have ratios of THF to CS<sub>2</sub> is 1:1. The vapor pressure is P=0.81 (25 °C) and the annealing time is 5 min.

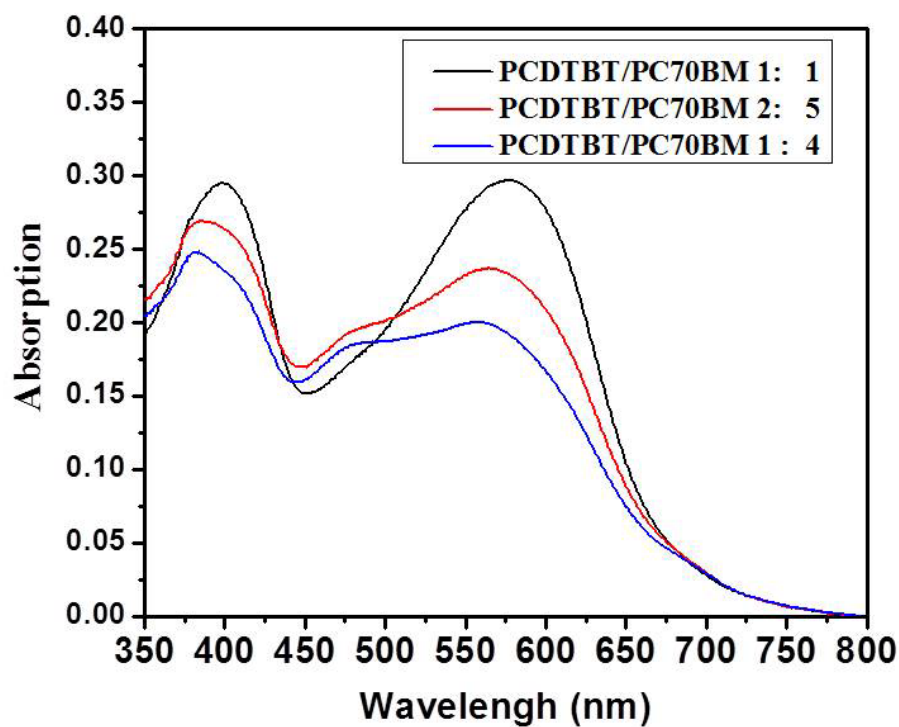

**Figure S6** Absorption spectra for PCDTBT: PC<sub>70</sub>BM blend films with different fullerene content after the M-SVA treatment. The mixed solvents have ratios of THF to CS<sub>2</sub> is 1:1. The vapor pressure is P=0.81 (25 °C) and the annealing time is 5 min.
